# Supplementary material for: The Association between Malaria and β-Carotene Levels: A Systematic Review and Meta-Analysis
Source: MDPI journal article supplement (doi:10.3390/antiox12091687), 2023-08-29
Supplement: s1 [file s1]

# **The Association between Malaria and $\beta$ -Carotene Levels: A Systematic Review and Meta-Analysis**

Kwuntida Uthaisar Kotepui<sup>1†</sup>, Aongart Mahittikorn<sup>2†</sup>, Polrat Wilairatana<sup>3\*</sup>, Frederick Ramirez Masangkay<sup>4</sup>, Manas Kotepui<sup>1\*</sup>

<sup>1</sup>Medical Technology, School of Allied Health Sciences, Walailak University, Thasala, Nakhon Si Thammarat 80160, Thailand

<sup>2</sup>Department of Protozoology, Faculty of Tropical Medicine, Mahidol University, Bangkok 10400, Thailand

<sup>3</sup>Department of Clinical Tropical Medicine, Faculty of Tropical Medicine, Mahidol University, Bangkok 10400, Thailand

<sup>4</sup>Department of Medical Technology, Faculty of Pharmacy, University of Santo Tomas, Manila 1000, Philippines

\*Corresponding author

† These authors contributed equally to this work.

Kwuntida Uthaisar Kotepui: [kwuntida.ut@wu.ac.th](mailto:kwuntida.ut@wu.ac.th)

Aongart Mahittikorn: [aongart.mah@mahidol.ac.th](mailto:aongart.mah@mahidol.ac.th)

Frederick Ramirez Masangkay: [frederick\\_masangkay2002@yahoo.com](mailto:frederick_masangkay2002@yahoo.com)

Polrat Wilairatana: [polrat.mah@mahidol.ac.th](mailto:polrat.mah@mahidol.ac.th)

Manas Kotepui [manas.ko@wu.ac.th](mailto:manas.ko@wu.ac.th), Tel+ :.66954392469

**Table S4.** Subgroup analyses of  $\beta$ -carotene levels between malaria cases and uninfected controls.

| Subgroup analyses                                         | <i>P</i> value | Hedges' <i>g</i> (95% CI) | <i>I</i> <sup>2</sup> | Number of studies |
|-----------------------------------------------------------|----------------|---------------------------|-----------------------|-------------------|
| <b>Publication years</b>                                  |                |                           |                       |                   |
| Before 2010                                               | < 0.01         | -0.77 (-1.01–(-0.53))     | 0                     | 3                 |
| 2010-2019                                                 | N/A            | -3.93 (-4.65–(-3.21))     | N/A                   | 1                 |
| 2010-2023                                                 | 0.15           | -0.88 (-2.08–0.32)        | 92.84                 | 3                 |
| <b>Study design</b>                                       |                |                           |                       |                   |
| Case-control study                                        | 0.02           | -1.26 (-2.28–(-0.25))     | 95.66                 | 5                 |
| Cohort study                                              | N/A            | -1.99 (-3.03–(-0.95))     | N/A                   | 1                 |
| Cross-sectional study                                     | N/A            | -0.73 (-1.08–(-0.38))     | N/A                   | 1                 |
| <b>Continent</b>                                          |                |                           |                       |                   |
| Africa                                                    | < 0.01         | -2.00 (-3.22–(-0.77))     | 94.20                 | 4                 |
| Asia                                                      | 0.21           | -0.39 (-1.00–0.22)        | 83.97                 | 3                 |
| <b>Participant's groups</b>                               |                |                           |                       |                   |
| Children                                                  | < 0.01         | -1.66 (-2.68–(-0.65))     | 95.21                 | 4                 |
| Adults                                                    | N/A            | -1.99 (-3.03–(-0.95))     | N/A                   | 1                 |
| Children, adults                                          | 0.71           | -0.19 (-1.19–0.81)        | 89.02                 | 1                 |
| <b><i>Plasmodium</i> species</b>                          |                |                           |                       |                   |
| <i>P. falciparum</i>                                      | < 0.01         | -1.91 (-3.06–(-0.76))     | 95.30                 | 4                 |
| <i>P. falciparum</i> , <i>P. vivax</i> , mixed infections | N/A            | -0.69 (-1.11–(-0.27))     | N/A                   | 1                 |
| Not specified                                             | 0.61           | -0.34 (-1.66–0.98)        | 91.90                 | 2                 |
| <b>Clinical status</b>                                    |                |                           |                       |                   |
| Symptomatic                                               | < 0.01         | -1.64 (-2.52–(-0.76))     | 94.28                 | 5                 |
| Not specified                                             | 0.61           | -0.34 (-1.66–0.98)        | 91.90                 | 2                 |
| <b>Methods for <math>\beta</math>-carotene</b>            |                |                           |                       |                   |
| HPLC                                                      | 0.04           | -0.53 (-1.04–(-0.03))     | 80.57                 | 4                 |
| Other methods/Not specified                               | 0.01           | -2.35 (-4.20–(-0.49))     | 95.79                 | 3                 |

Abbreviations: CI, confidence interval; HPLC, High performance liquid chromatography; N/A, not assessed
